# Supplementary material
Source: PubMed Central journal article supplement (PMC3111246)
Supplement: supp_1947601911408888_DS_10.1177_1947601911408888_sup.pdf [file supp_1947601911408888_DS_10.1177_1947601911408888_sup.pdf]

## SUPPLEMENTARY MATERIAL

### OLIGONUCLEOTIDE SEQUENCES OF THE PRIMERS USED IN THIS WORK

#### **pri-miR-193a**

Forward : TGTAACCCTTGGAGGGCTGGGTTT

Reverse : AAGCTCTGGGTGTCCTCA

#### **pri-miR-193b**

Forward: TCAGCCATGGTGTGGCAAATGT

Reverse: AACCGGATCACTGAAGGAATCGT

#### **pri-miR-181a**

Forward: AAGGTGGACACACCAGGACTTTCT

Reverse: CAACCCACCGACAGCAATGAATGT

#### **uPA 3'UTR, miR-193 seeding mutant**

Forward: GTCCCTTTCTT**CCGGTC**TTATCCCTTCCTTTTAGCCTAGTTCATCC

Reverse: GGAAGGGATAA **GACCGG** AAGAAAGGGACATCTATGTGAAAGTG

#### **uPA 3'UTR, miR-181 non-conserved seeding mutant**

Forward: CAGTGCCTGG **CTTACAT** TTATTCTGCAGCATGACCTGTGACCAGC

Reverse: GCAGAATAA **ATGTAAG** CCAGGCACTGTCACGTGGGGGACCC

#### **uPA 3'UTR, miR-181 conserved seeding mutant**

Forward: CTGATATTCCA**ACTTACAT**TCAGGAAATATATATGTGTGTGTATGTTTG

Reverse: TATTTCTG**ATGTAAG**TTGGAATATCAGAGCCCTGCCCTGAAGT
